# Supplementary material
Source: Springer Nature journal article supplement (https://www.springermedizin.de/resource/supplementary/12885_2008_1298_MOESM3_ESM.pdf/9471682)

$\pm$  SD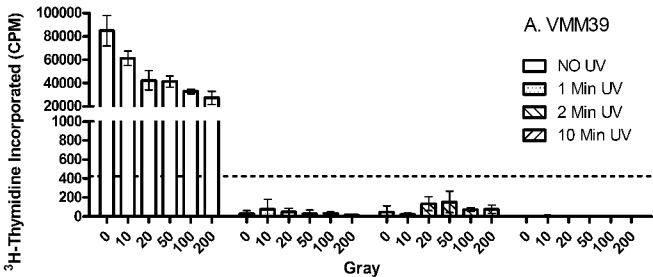 $\pm$  SD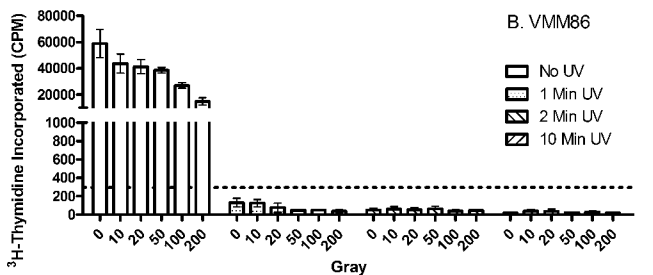

Supplement: MOESM3 [file 9471682]
